# Supplementary material for: Glypican-1 controls brain size through regulation of fibroblast growth factor signaling in early neurogenesis
Source: PubMed Central journal article supplement (PMC2746204; doi:10.1186/1749-8104-4-33), 2009-09-04

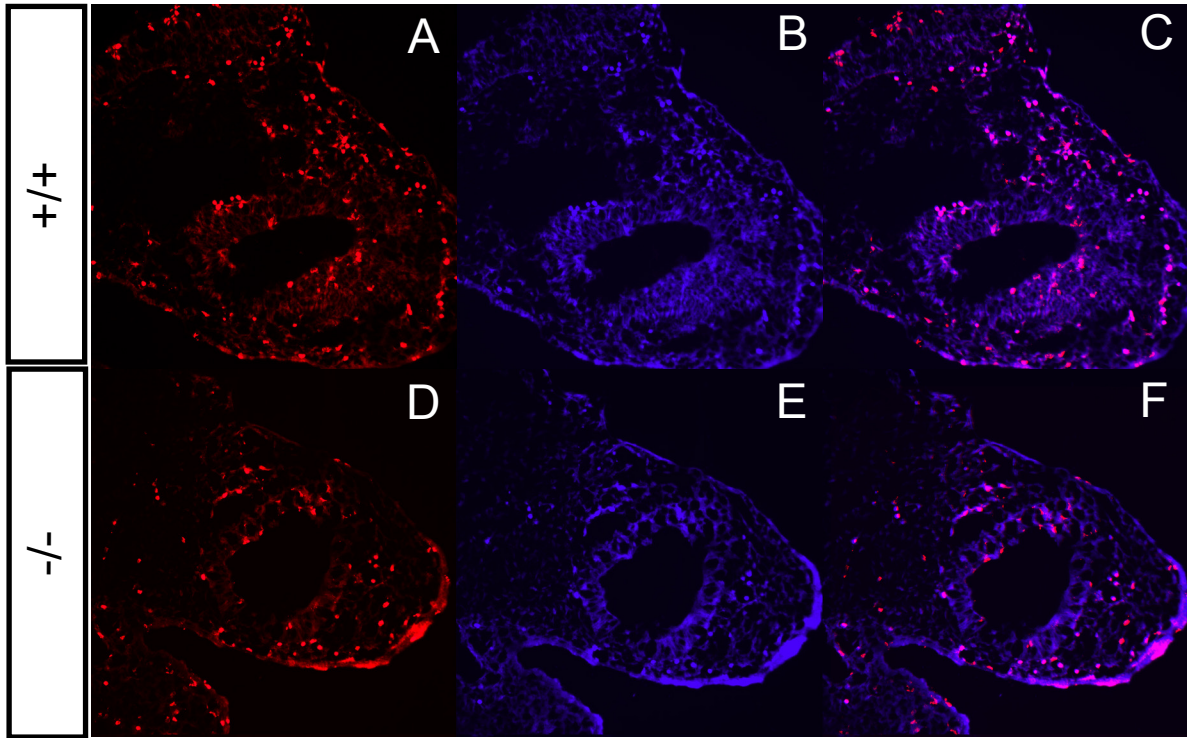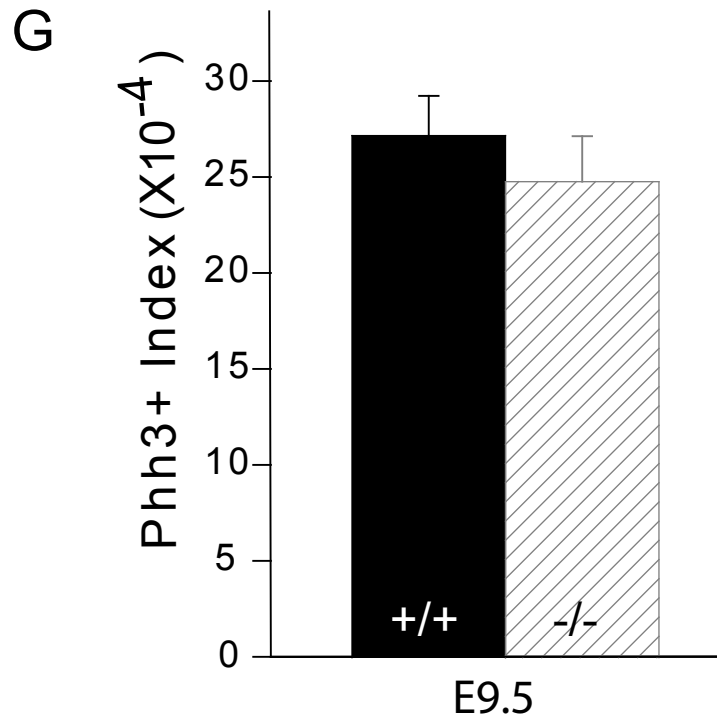

Supplement: 1749-8104-4-33-S3.pdf [file 1749-8104-4-33-S3.pdf]
